# Supplementary material
Source: publisher figshare collection journal article supplement (https://acs.figshare.com/ndownloader/files/4532452)
Supplement: Supplementary file 1 [file 4532452]

Supporting Information for ...

# Monitoring and Mapping Imperfections in Silane-Based Self-Assembled Monolayers by Chemical Amplification\*\*

Hanifa Jalali, and Byron D. Gates<sup>\*</sup>

[\*] Prof. B. D. Gates, H. Jalali

Department of Chemistry

Simon Fraser University

8888 University Drive

Burnaby, BC V5A 1S6 (Canada)

Telephone Number: (778) 782-8066

Fax Number: (778) 782-3765

Email Address: bgates@sfu.ca

[\*\*] This research was supported in part by NSERC through a Discovery Grant, the Canada Research Chairs Program, and Simon Fraser University (SFU). This work made use of 4D LABS shared facilities supported by CFI, BCKDF, and SFU. The authors would like to thank Dr. Hogan Yu for the use of his laboratory equipment for water contact angle measurements.

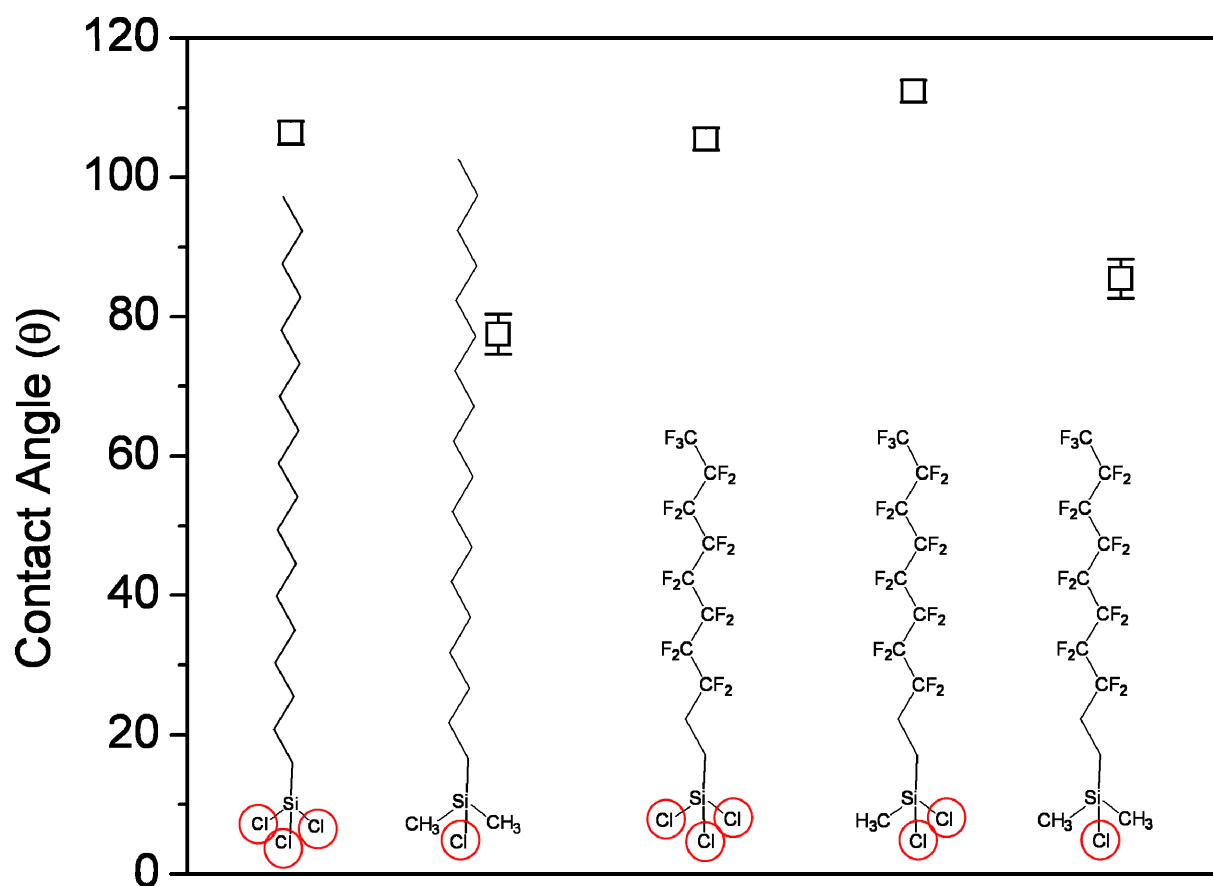

**Figure S1.** Water contact angle measurements for substrates of silicon oxide coated with silane-based SAMs. These monolayers were prepared using identical conditions as outlined in the manuscript. Plotted contact angles correspond to SAMs of the molecule depicted below each data point. Reactive groups on each silane molecule are circled in red. Error bars indicate a value of twice the standard deviation in contact angle averaged over 10 distinct measurements.

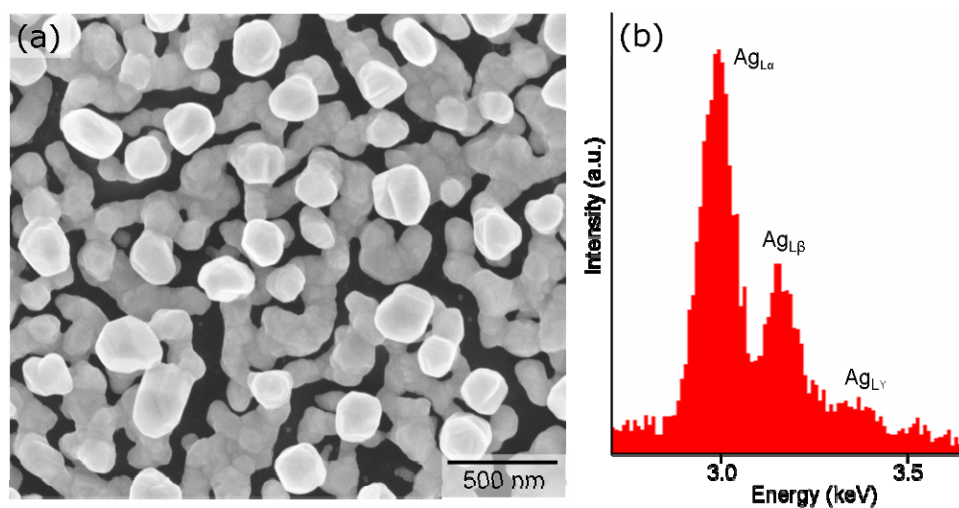

**Figure S2.** (a) SEM image and (b) integrated energy dispersive X-ray spectrum (integrated over  $2\ \mu\text{m}^2$  for 100 s) for a silicon oxide coated substrate after exposure to a solution of 5 mM silver nitrate and 1.8 mM hydrofluoric acid. This demonstrates deposition of large silver aggregates over the substrate in the absence of a coating of silane-based SAMs.

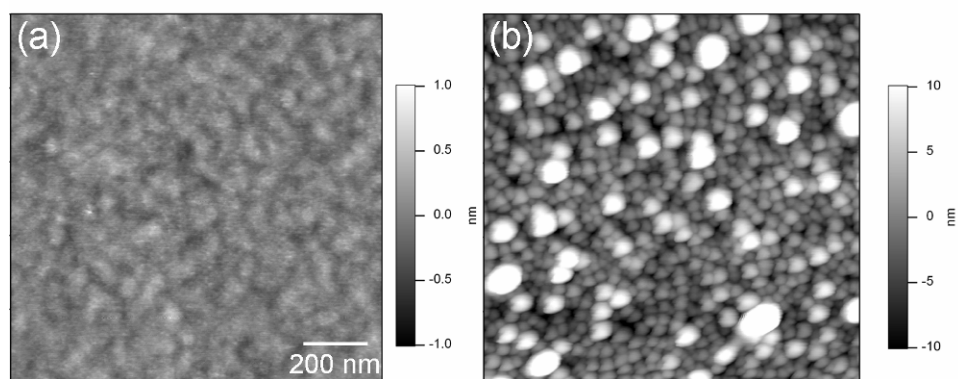

**Figure S3.** Representative AFM images of silicon substrates (coated with a native oxide) after immersion in (a) 1 mM aqueous solution of  $\text{AgNO}_3$  for >5 min, and (b) 1 mM aqueous solution of  $\text{AgNO}_3$  with 1.8 mM hydrofluoric acid for 5 min.
